# Supplementary material for: Assessing Plastic Waste Discharges into the Sea in Indonesia: An Integrated High-Resolution Modeling Approach That Accounts for Hydrology and Local Waste Handling Practices
Source: MDPI journal article supplement (doi:10.3390/w15061143), 2023-03-15
Supplement: s1 [file s1]

## **SUPPLEMENTARY MATERIAL**

This document presents the Supplementary Material for the manuscript: “*Assessing plastic waste discharges into the sea in Indonesia - an integrated, high-resolution modelling approach that accounts for hydrology and local waste handling practices*” by Veiga et al.

### **CONTENTS**

Overview of data sources used in the SWM and environmental modelling (S.1); Rate of exposure of plastic waste for different disposal destinations (S.2); Environmental fate parameters used in the D-Emissions and D-Water Quality software (S.3); Mass flow diagrams with key study results for urban and rural areas (S.4); Summary of modelling results of MPW subject to environmental processes and discharged into the sea for the main Indonesian regions (S.5); Spatial distribution of estimated daily rates of plastic waste openly burned in Indonesia (S.6); Spatial distribution of estimated daily rates of disposal of plastic waste in water across Indonesia (S.7); Spatial distribution of estimated daily rates of disposal of plastic waste in water across Indonesia; Spatial distribution of estimated daily rates of illegal dumping of plastic waste across Indonesia (S.8); Summary of modelling results of plastic waste management for the main Indonesian regions (S.9); Modelled timeseries of plastic discharges and estimations from observations in Bekasi river mouth (S.10). Indexed monthly average MPW discharges and multi-year indexed average river discharges for Java (S.11); Top 10 Indonesian rivers discharging higher amounts of plastic waste (S.12); Timeseries of modelled daily plastic waste discharges and plastic waste removed from a trash-rack in Java (S.13); Summary of uncertainty associated to SWM data and hydrology in the estimated leakages of MPW (S.14); Comparison of the results with previous studies (S.15).

File S1. Overview of data sources used in the SWM and environmental modelling, providing details for section 2 - Material and Methods

| Solid waste management                                                                        |                                                                                                                                                                                                                  |                                                                                                                                                                                                                                                                                                                                                                                                                                                                                                                                                                                                                       |
|-----------------------------------------------------------------------------------------------|------------------------------------------------------------------------------------------------------------------------------------------------------------------------------------------------------------------|-----------------------------------------------------------------------------------------------------------------------------------------------------------------------------------------------------------------------------------------------------------------------------------------------------------------------------------------------------------------------------------------------------------------------------------------------------------------------------------------------------------------------------------------------------------------------------------------------------------------------|
| Indicator / parameter                                                                         | Data sources                                                                                                                                                                                                     | Remarks                                                                                                                                                                                                                                                                                                                                                                                                                                                                                                                                                                                                               |
| <b>Solid waste generated/capita (SWG)</b>                                                     | <ul style="list-style-type: none"> <li>• Solid Waste Master Plans (SWMPs)</li> <li>• National Waste Management Information System database – SIPSN, Ministry of Environment and Forestry</li> </ul>              | <ul style="list-style-type: none"> <li>• Data available for only half (257) of total kabupaten/kota in Indonesia</li> <li>• SWMPs data based on sampling of SWG and composition, considered to be good quality</li> <li>• SIPSN is self-reported, no data validation, not based on sampling, therefore lower reliability</li> <li>• For the kabupaten/kota without data, the average amount of SWG (based on combined SWMPs and SIPSN database for households and non-households) is a representative value</li> <li>• Average amount of SWG and plastic content are differentiated between kabupaten/kota</li> </ul> |
| <b>Plastic content</b>                                                                        |                                                                                                                                                                                                                  |                                                                                                                                                                                                                                                                                                                                                                                                                                                                                                                                                                                                                       |
| <b>Total plastic waste formally collected</b>                                                 | <ul style="list-style-type: none"> <li>• Ministry of Public Works and Housing (PUPR)</li> <li>• SIPSN database</li> <li>• Cross-checked with SWG and HANSOS 2017 (Indonesian Statistics Bureau - BPS)</li> </ul> | <ul style="list-style-type: none"> <li>• Landfill data compared to SWG and BPS HANSOS 2017 and lowest number selected as final figure for formally collected plastic waste.</li> </ul>                                                                                                                                                                                                                                                                                                                                                                                                                                |
| <b>Collected by residential waste pickers</b>                                                 | <ul style="list-style-type: none"> <li>• World Economic Forum, 2020</li> </ul>                                                                                                                                   | <ul style="list-style-type: none"> <li>• Values for four archetypes (mega, medium, rural, and remote) extrapolated to kabupaten/kota (recovery factor of 67%) is a representative value</li> </ul>                                                                                                                                                                                                                                                                                                                                                                                                                    |
| <b>Handling practices for uncollected waste (burning, burying, discard in water, dumping)</b> | <ul style="list-style-type: none"> <li>• HANSOS 2017</li> </ul>                                                                                                                                                  | <ul style="list-style-type: none"> <li>• Data only at provincial level</li> <li>• Split into urban and rural</li> <li>• Good quality data, although only collected every three years.</li> </ul>                                                                                                                                                                                                                                                                                                                                                                                                                      |
| <b>Recovery from TPS3R</b>                                                                    | <ul style="list-style-type: none"> <li>• PUPR</li> </ul>                                                                                                                                                         | <ul style="list-style-type: none"> <li>• No systematic data available</li> <li>• Total plastic recycled is assumed at 78.3% of TPS3R design capacity</li> <li>• Based on three studies in kota Medan and Malang (2016, 2017, and 2019) and applied nationally</li> </ul>                                                                                                                                                                                                                                                                                                                                              |
| <b>Recovery from waste bank</b>                                                               | <ul style="list-style-type: none"> <li>• SIPSN database</li> </ul>                                                                                                                                               | <ul style="list-style-type: none"> <li>• No systematic data available</li> <li>• Total plastic recycled is assumed to be the same as Waste Bank design capacity</li> </ul>                                                                                                                                                                                                                                                                                                                                                                                                                                            |
| <b>Disposal to sanitary landfills, controlled landfills and formal dumpsites</b>              | <ul style="list-style-type: none"> <li>• Sanitary landfill gate data or design capacity: PUPR and SIPSN database</li> <li>• Expert opinion in case of poor data coverage</li> </ul>                              | <ul style="list-style-type: none"> <li>• Data only available for 351 out of 437 landfills</li> <li>• Weighbridge measurements limited (exact figure unknown)</li> <li>• 130 landfills have been in operation for more than 10 years, which is the minimum lifetime design capacity. The study assumes that the rate of plastic waste available for wash-off is not affected by the fact that these landfills have already reached their capacity but are still operational.</li> </ul>                                                                                                                                |
| <b>Leakage rate from sanitary landfills, controlled landfills and formal dumpsites</b>        | <ul style="list-style-type: none"> <li>• Rate: expert opinion</li> <li>• Landfill coordinates: PUPR and SIPSN</li> </ul>                                                                                         | <ul style="list-style-type: none"> <li>• If landfill coordinates available: considered as point source</li> <li>• For controlled landfills and dumpsites, three ranges (%) defined: low, mid and high of the total plastic disposed</li> </ul>                                                                                                                                                                                                                                                                                                                                                                        |

| Environmental modelling                                        |                                                                                        |                                                                                                                                                   |
|----------------------------------------------------------------|----------------------------------------------------------------------------------------|---------------------------------------------------------------------------------------------------------------------------------------------------|
| Model parameters                                               | Data sources                                                                           | Remarks                                                                                                                                           |
| Retention at dams                                              | <ul style="list-style-type: none"> <li>Dams location: PUPR</li> </ul>                  | <ul style="list-style-type: none"> <li>All dams assumed to have equal retention rate of 100% of plastic litter from upstream catchment</li> </ul> |
| Weathering/degradation, burial on land and retention in rivers | <ul style="list-style-type: none"> <li>Expert judgement</li> <li>Literature</li> </ul> | <ul style="list-style-type: none"> <li>First-order removal processes</li> </ul>                                                                   |

File S2. Rate of exposure to hydrology for the different destinations of formally collected and uncollected plastic waste. (\*losses from collection and sorting are accounted under “uncollected”). This summarizes the exposure rates assumed for the study, as described in section 2 – Material and Methods.

| Plastic waste          | Destination                           | Rate of exposure of waste to hydrology | Source type                              |
|------------------------|---------------------------------------|----------------------------------------|------------------------------------------|
| Formally collected (*) | Sanitary landfill, TPS3R, waste banks | 0%                                     | Point sources, terrestrial environment   |
|                        | Controlled landfill                   | 2% (low), 3% (mid) and 5% (high)       |                                          |
|                        | Formal open dumpsite                  | 5% (low), 10% (mid) and 20% (high)     |                                          |
| Uncollected            | Disposal in water                     | 100%                                   | Diffuse sources, aquatic environment     |
|                        | Dumping/fly-tipping                   | 100%                                   | Diffuse sources, terrestrial environment |
|                        | Burning                               | 0%                                     |                                          |
|                        | Burying                               | 0%                                     |                                          |

File S3. Environmental fate parameters used in the D-Emissions and D-Water Quality software as referred to in section 2 – Material and Methods.

| Parameter                                              | Value | Unit                  |
|--------------------------------------------------------|-------|-----------------------|
| terrestrial retention rate $r_t$ , paved surfaces      | 0.02  | (d <sup>-1</sup> )    |
| terrestrial retention rate $r_t$ , unpaved surfaces    | 0.03  | (d <sup>-1</sup> )    |
| aquatic retention parameter $k_a$                      | 0.5   | (m d <sup>-1</sup> )  |
| threshold for start of mobilization by runoff $t_{lo}$ | 2     | (mm d <sup>-1</sup> ) |
| threshold for complete mobilization by runoff $t_{hi}$ | 5     | (mm d <sup>-1</sup> ) |

## RURAL

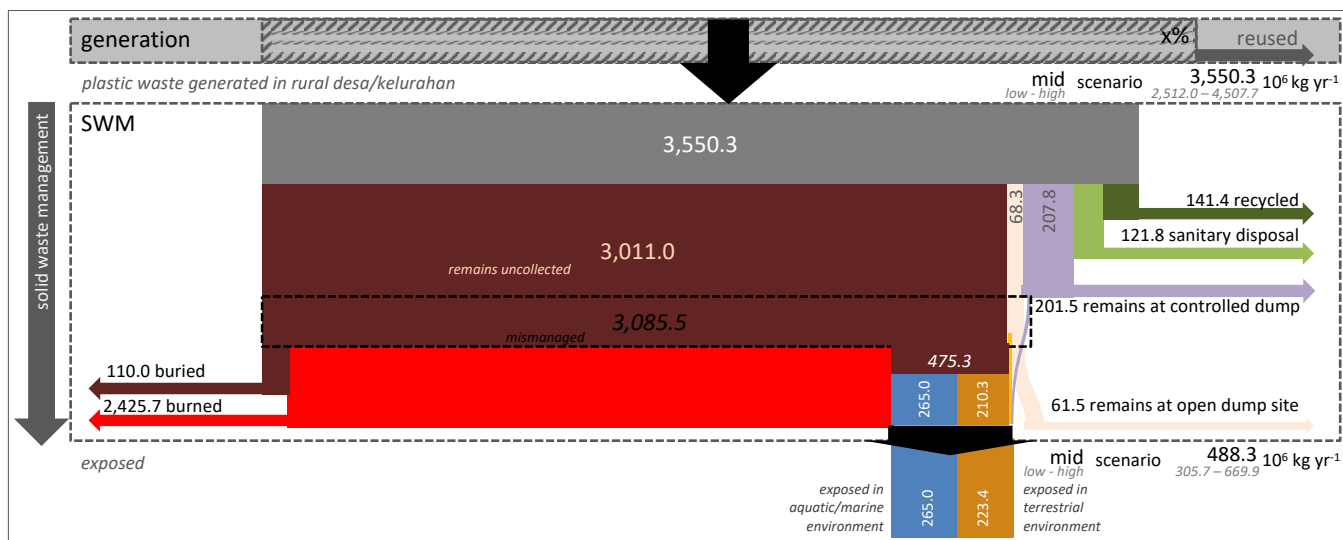

## URBAN

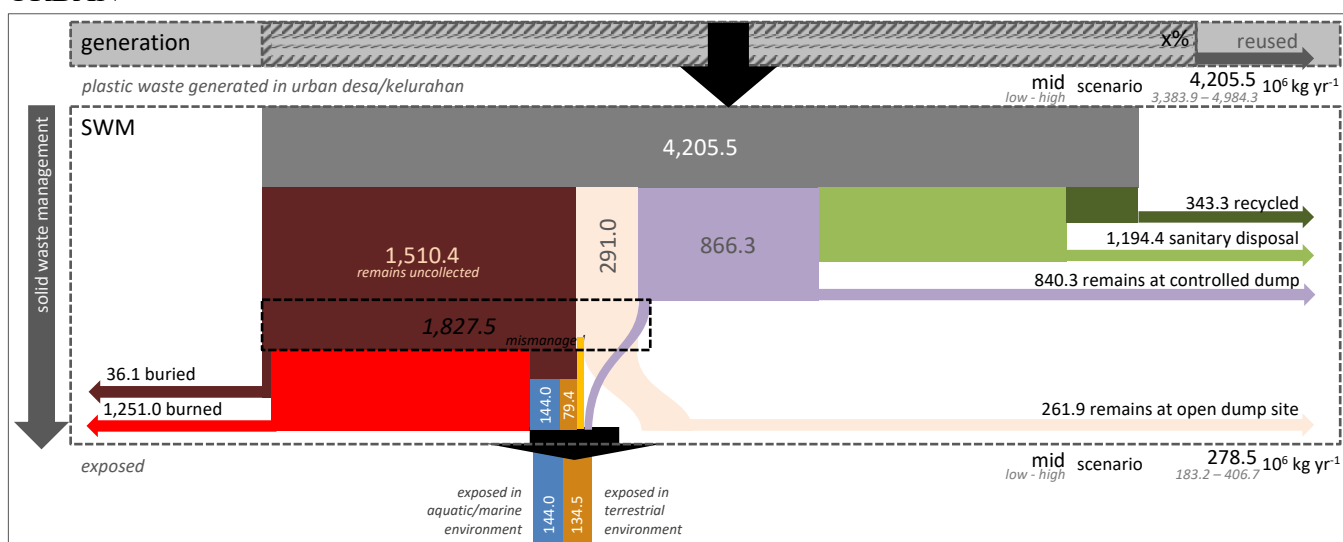

File S4. Mass flow diagrams showing the estimated amounts of plastic waste across different waste handling and environmental processes, from its generation to discharge into the marine environment (values representative for mid-range estimate in  $10^6$  kg yr<sup>-1</sup>). Top: solid waste management in rural villages; Bottom: solid waste management in urban villages. This complements Figure 2 in section 3 - Results, providing insight into the mass flow of plastic waste in rural and urban areas.

File S5. Summary of modelling outputs for the main Indonesian regions, detailing results of total MPW exposed to hydrology and subject to environmental processes. This is **referred to in section 3 - Results**, where we compare the inputs of plastic discharged by rivers and directly from coastal areas.

|              |                                                                                        | Indonesia    | Sumatra      | Java         | Bali & Nusa Tenggara | Kalimantan  | Sulawesi    | Maluku      | Papua       |
|--------------|----------------------------------------------------------------------------------------|--------------|--------------|--------------|----------------------|-------------|-------------|-------------|-------------|
|              | Urban population                                                                       | 131,129,774  | 22,492,162   | 88,138,336   | 5,693,960            | 6,704,096   | 6,229,888   | 832,169     | 1,039,163   |
|              | Rural population                                                                       | 130,959,862  | 34,616,853   | 60,034,882   | 8,795,488            | 9,289,130   | 12,905,476  | 2,092,559   | 3,225,474   |
| SWM model    | <b>29 Mismanaged plastic waste from terrestrial sources that may be washed-off and</b> | <b>766.8</b> | <b>202.1</b> | <b>318.4</b> | <b>52.1</b>          | <b>67.7</b> | <b>81.7</b> | <b>21.8</b> | <b>23.1</b> |
|              | 30 to dry terrestrial environment                                                      | 357.9        | 98.5         | 144.6        | 30.3                 | 18.9        | 41.7        | 9.3         | 14.6        |
|              | 31 as point sources                                                                    | 68.2         | 21.2         | 34.9         | 2.7                  | 3.5         | 4.2         | 1.2         | 0.5         |
|              | 32 as diffuse sources                                                                  | 289.8        | 77.2         | 109.7        | 27.6                 | 15.4        | 37.6        | 8.1         | 14.1        |
|              | 33 to wet terrestrial environment                                                      | 408.9        | 103.6        | 173.8        | 21.8                 | 48.9        | 39.9        | 12.4        | 8.5         |
|              | 34 as point sources                                                                    | -            | -            | -            | -                    | -           | -           | -           | -           |
|              | 35 as diffuse sources                                                                  | 408.9        | 103.6        | 173.8        | 21.8                 | 48.9        | 39.9        | 12.4        | 8.5         |
| DelWAQ model | <b>36 Total disposed in the dry environment</b>                                        | <b>322.5</b> | <b>89.9</b>  | <b>139.1</b> | <b>24.8</b>          | <b>18.9</b> | <b>33.0</b> | <b>3.7</b>  | <b>13.0</b> |
|              | 37 retained in soils                                                                   | 168.8        | 23.6         | 78.4         | 21.4                 | 10.3        | 22.5        | 3.3         | 9.4         |
|              | 38 washed-off to rivers                                                                | 153.6        | 66.4         | 60.7         | 3.4                  | 8.7         | 10.5        | 0.4         | 3.6         |
|              | <b>39 Final destination (riverine environment)</b>                                     | <b>520.6</b> | <b>159.3</b> | <b>228.4</b> | <b>21.9</b>          | <b>53.5</b> | <b>42.3</b> | <b>4.8</b>  | <b>10.4</b> |
|              | 40 captured behind dams                                                                | 20.6         | 0.3          | 19.2         | 1.0                  | 0.0         | 0.2         | -           | -           |
|              | 41 buried or stored in river                                                           | 212.3        | 74.1         | 88.6         | 5.4                  | 23.2        | 14.2        | 2.0         | 4.8         |
|              | 42 total discharged into marine environment                                            | 287.7        | 84.9         | 120.6        | 15.6                 | 30.3        | 27.9        | 2.8         | 5.6         |
|              | <b>43 Total discharged into marine environment from rivers</b>                         | <b>287.7</b> | <b>84.9</b>  | <b>120.6</b> | <b>15.6</b>          | <b>30.3</b> | <b>27.9</b> | <b>2.8</b>  | <b>5.6</b>  |
| Coastal zone | <b>44 Coastal zone</b>                                                                 | <b>78.4</b>  | <b>18.6</b>  | <b>11.6</b>  | <b>8.8</b>           | <b>5.3</b>  | <b>16.9</b> | <b>13.6</b> | <b>3.5</b>  |
|              | 45 to dry environment (coastal zone)                                                   | 37.3         | 8.5          | 5.6          | 5.5                  | 1.5         | 8.7         | 5.6         | 2.0         |
|              | 46 washed-off directly to marine environment                                           | 17.8         | 4.1          | 2.6          | 2.6                  | 0.7         | 4.2         | 2.7         | 0.9         |
|              | 47 disposed directly into marine environment                                           | 41.1         | 10.0         | 6.1          | 3.4                  | 3.9         | 8.2         | 8.0         | 1.5         |
|              | <b>48 Total into marine environment from coastal area</b>                              | <b>58.9</b>  | <b>14.1</b>  | <b>8.7</b>   | <b>6.0</b>           | <b>4.6</b>  | <b>12.3</b> | <b>10.7</b> | <b>2.5</b>  |
| Result       | 49 total discharged into marine environment from rivers                                | 287.7        | 84.9         | 120.6        | 15.6                 | 30.3        | 27.9        | 2.8         | 5.6         |
|              | 50 total leaked into marine environment from coastal areas                             | 58.9         | 14.1         | 8.7          | 6.0                  | 4.6         | 12.3        | 10.7        | 2.5         |
|              | <b>51 Total leaked into the Marine Environment</b>                                     | <b>346.5</b> | <b>99.1</b>  | <b>129.3</b> | <b>21.5</b>          | <b>34.9</b> | <b>40.2</b> | <b>13.5</b> | <b>8.1</b>  |
|              | MPW disposed into marine environment per capita (Urban) [kg/cap/year]                  | 0.73         | 0.97         | 0.62         | 0.74                 | 1.29        | 0.85        | 0.44        | 0.80        |
|              | MPW disposed into marine environment per capita (Rural) [kg/cap/year]                  | 1.46         | 1.82         | 1.09         | 1.29                 | 2.33        | 1.75        | 1.18        | 1.47        |

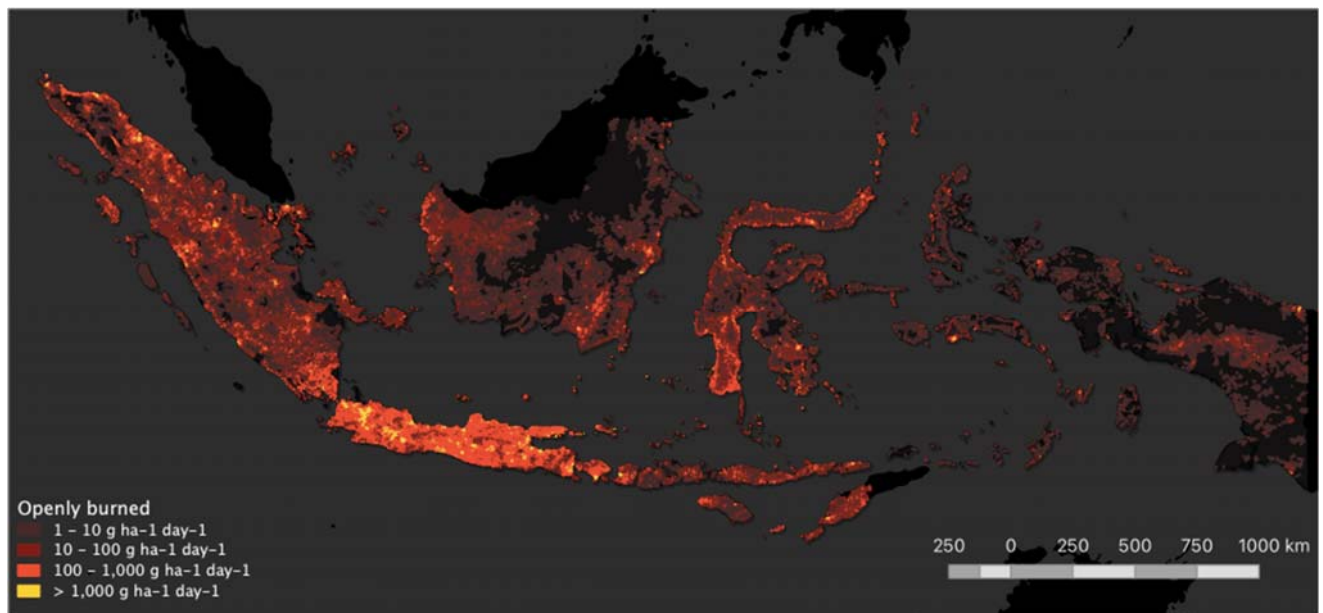

File S6. Estimated daily rates of MPW that is openly burned (g ha<sup>-1</sup> day<sup>-1</sup>) across Indonesia. This is **referred to in section 3 - Results**, to illustrate how widespread open burning of plastic waste is and the detailed spatial differences across the country.

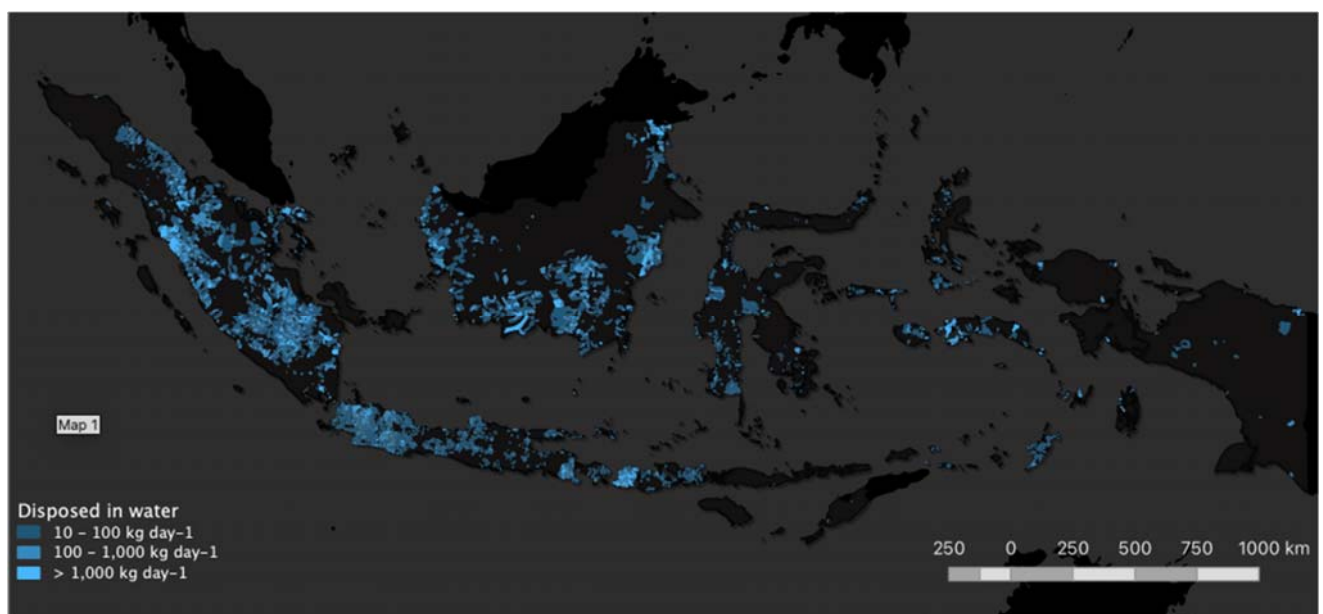

File S7. Estimated daily amounts of MPW that is directly disposed of in waterways (kg day<sup>-1</sup>) across Indonesia. This is **referred to in section 3 - Results**, to illustrate the estimated disposal of plastic waste directly in water and the detailed spatial differences across the country.



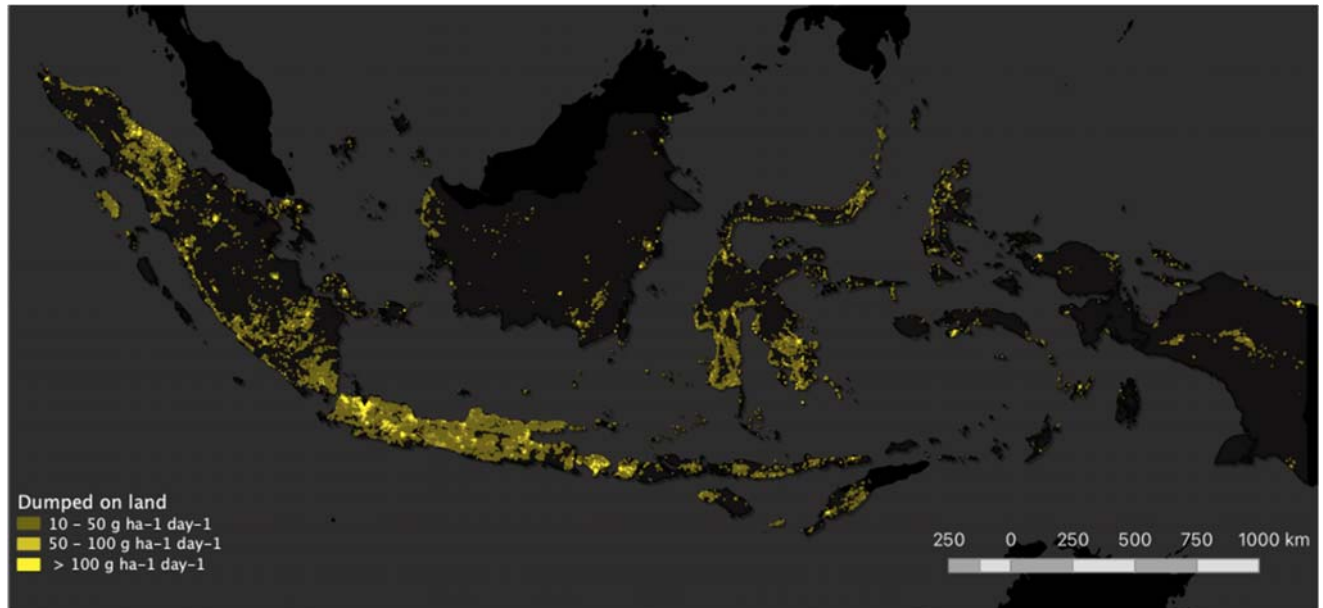

File S8. Estimated daily rates of MPW ( $\text{g ha}^{-1}\text{day}^{-1}$ ) that is illegally dumped on land. This is **referred to in section 3 - Results**, to illustrate the extent of this waste handling practice and the detailed spatial differences across the country.

File S9. Waste handling/waste management destination of plastic waste (total amounts; share) generated rural and urban areas for the whole Indonesia and per regions. This provides the details of the estimated amounts of plastic waste for different disposal destinations in rural and urban areas, as discussed in **section 3 - Results**. It includes the data used to produce Figure 4, Figure S6 and Figure S7.

|       | Destination         | Indonesia | Sumatra | Java    | Bali_NT | Kalimantan | Sulawesi | Maluku | Papua  | SI                    |
|-------|---------------------|-----------|---------|---------|---------|------------|----------|--------|--------|-----------------------|
| Rural | Plastic Waste Gen.  | 3,550.3   | 938.3   | 1,602.9 | 242.8   | 275.4      | 344.0    | 59.8   | 87.3   | 10 <sup>6</sup> kg/yr |
|       | Recycled            | 141.4     | 27.6    | 87.1    | 4.2     | 4.6        | 12.3     | 4.2    | 1.4    | 10 <sup>6</sup> kg/yr |
|       | Sanitary Landfill   | 121.8     | 9.0     | 50.5    | 17.1    | 30.3       | 10.4     | 2.9    | 1.6    | 10 <sup>6</sup> kg/yr |
|       | Controlled Landfill | 207.8     | 70.1    | 50.7    | 27.1    | 25.8       | 24.1     | 7.5    | 2.5    | 10 <sup>6</sup> kg/yr |
|       | Open Dumping        | 68.3      | 17.4    | 29.9    | 7.9     | 4.3        | 4.1      | 2.9    | 1.8    | 10 <sup>6</sup> kg/yr |
|       | Buried              | 110.0     | 24.8    | 51.5    | 6.3     | 10.7       | 9.5      | 2.5    | 4.7    | 10 <sup>6</sup> kg/yr |
|       | Burned              | 2,425.7   | 650.6   | 1,181.3 | 142.8   | 153.6      | 220.2    | 21.7   | 55.5   | 10 <sup>6</sup> kg/yr |
|       | Dumping             | 210.3     | 61.4    | 61.2    | 22.4    | 12.4       | 32.6     | 7.4    | 12.9   | 10 <sup>6</sup> kg/yr |
|       | Water               | 265.0     | 77.4    | 90.6    | 15.0    | 33.8       | 30.8     | 10.7   | 6.8    | 10 <sup>6</sup> kg/yr |
| Urban | Plastic Waste Gen.  | 4,205.5   | 786.6   | 2,697.1 | 212.8   | 233.6      | 210.2    | 30.9   | 34.2   | 10 <sup>6</sup> kg/yr |
|       | Recycled            | 343.3     | 57.3    | 227.3   | 14.6    | 15.0       | 21.2     | 3.2    | 4.7    | 10 <sup>6</sup> kg/yr |
|       | Sanitary Landfill   | 1,194.4   | 49.3    | 912.6   | 106.6   | 73.9       | 45.0     | 0.4    | 6.8    | 10 <sup>6</sup> kg/yr |
|       | Controlled Landfill | 866.3     | 275.8   | 404.5   | 22.7    | 66.3       | 73.8     | 18.7   | 4.4    | 10 <sup>6</sup> kg/yr |
|       | Open Dumping        | 291.0     | 91.1    | 182.5   | 4.0     | 3.5        | 8.1      | 1.2    | 0.7    | 10 <sup>6</sup> kg/yr |
|       | Buried              | 36.1      | 5.5     | 25.4    | 1.8     | 1.7        | 0.9      | 0.5    | 0.3    | 10 <sup>6</sup> kg/yr |
|       | Burned              | 1,251.0   | 265.6   | 813.0   | 51.1    | 55.2       | 47.1     | 4.5    | 14.5   | 10 <sup>6</sup> kg/yr |
|       | Dumping             | 79.4      | 15.9    | 48.5    | 5.2     | 3.0        | 4.9      | 0.8    | 1.2    | 10 <sup>6</sup> kg/yr |
|       | Water               | 144.0     | 26.2    | 83.2    | 6.8     | 15.1       | 9.2      | 1.7    | 1.7    | 10 <sup>6</sup> kg/yr |
| Rural | Plastic Waste Gen.  | 100.0%    | 100.0%  | 100.0%  | 100.0%  | 100.0%     | 100.0%   | 100.0% | 100.0% | %                     |
|       | Recycled            | 4.0%      | 2.9%    | 5.4%    | 1.7%    | 1.7%       | 3.6%     | 7.1%   | 1.6%   | %                     |
|       | Sanitary Landfill   | 3.4%      | 1.0%    | 3.2%    | 7.0%    | 11.0%      | 3.0%     | 4.8%   | 1.9%   | %                     |
|       | Controlled Landfill | 5.9%      | 7.5%    | 3.2%    | 11.1%   | 9.4%       | 7.0%     | 12.6%  | 2.9%   | %                     |
|       | Open Dumping        | 1.9%      | 1.9%    | 1.9%    | 3.3%    | 1.6%       | 1.2%     | 4.9%   | 2.0%   | %                     |
|       | Buried              | 3.1%      | 2.6%    | 3.2%    | 2.6%    | 3.9%       | 2.8%     | 4.3%   | 5.3%   | %                     |
|       | Burned              | 68.3%     | 69.3%   | 73.7%   | 58.8%   | 55.8%      | 64.0%    | 36.2%  | 63.6%  | %                     |
|       | Dumping             | 5.9%      | 6.5%    | 3.8%    | 9.2%    | 4.5%       | 9.5%     | 12.3%  | 14.8%  | %                     |
|       | Water               | 7.5%      | 8.3%    | 5.7%    | 6.2%    | 12.3%      | 8.9%     | 17.9%  | 7.8%   | %                     |
| Urban | Plastic Waste Gen.  | 100.0%    | 100.0%  | 100.0%  | 100.0%  | 100.0%     | 100.0%   | 100.0% | 100.0% | %                     |
|       | Recycled            | 8.2%      | 7.3%    | 8.4%    | 6.8%    | 6.4%       | 10.1%    | 10.4%  | 13.7%  | %                     |
|       | Sanitary Landfill   | 28.4%     | 6.3%    | 33.8%   | 50.1%   | 31.6%      | 21.4%    | 1.3%   | 19.8%  | %                     |
|       | Controlled Landfill | 20.6%     | 35.1%   | 15.0%   | 10.7%   | 28.4%      | 35.1%    | 60.4%  | 12.9%  | %                     |
|       | Open Dumping        | 6.9%      | 11.6%   | 6.8%    | 1.9%    | 1.5%       | 3.8%     | 3.8%   | 2.0%   | %                     |
|       | Buried              | 0.9%      | 0.7%    | 0.9%    | 0.9%    | 0.7%       | 0.4%     | 1.5%   | 0.8%   | %                     |
|       | Burned              | 29.7%     | 33.8%   | 30.1%   | 24.0%   | 23.6%      | 22.4%    | 14.5%  | 42.4%  | %                     |
|       | Dumping             | 1.9%      | 2.0%    | 1.8%    | 2.4%    | 1.3%       | 2.3%     | 2.5%   | 3.4%   | %                     |
|       | Water               | 3.4%      | 3.3%    | 3.1%    | 3.2%    | 6.5%       | 4.4%     | 5.6%   | 5.0%   | %                     |



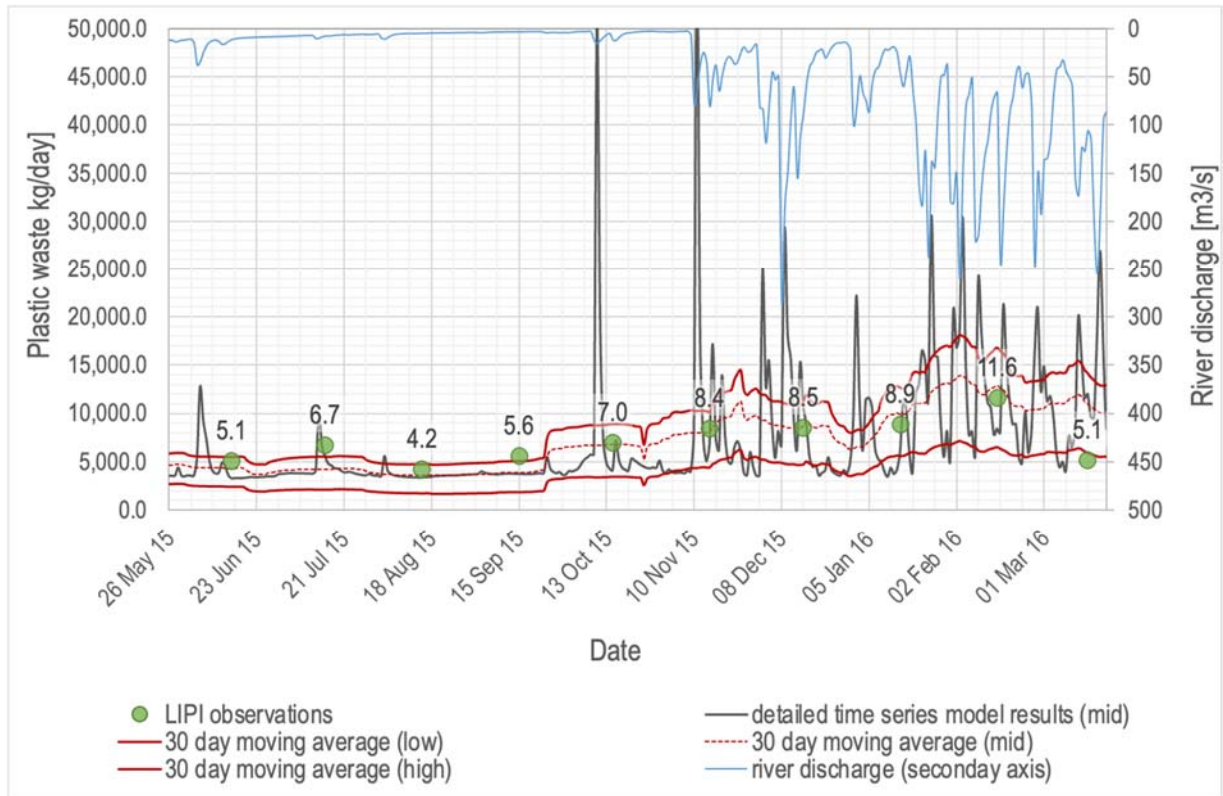

File S10. Plastic estimations resulting from Bekasi River mouth observations (Cordova and Nurhati, 2019) (green dots), daily discharge timeseries derived from model results (grey spiky line); 30-day moving average plastic discharge derived from model results (blue line); daily average river discharges (light blue, reverse right axis). This is referred to in **section 3 – Results**.

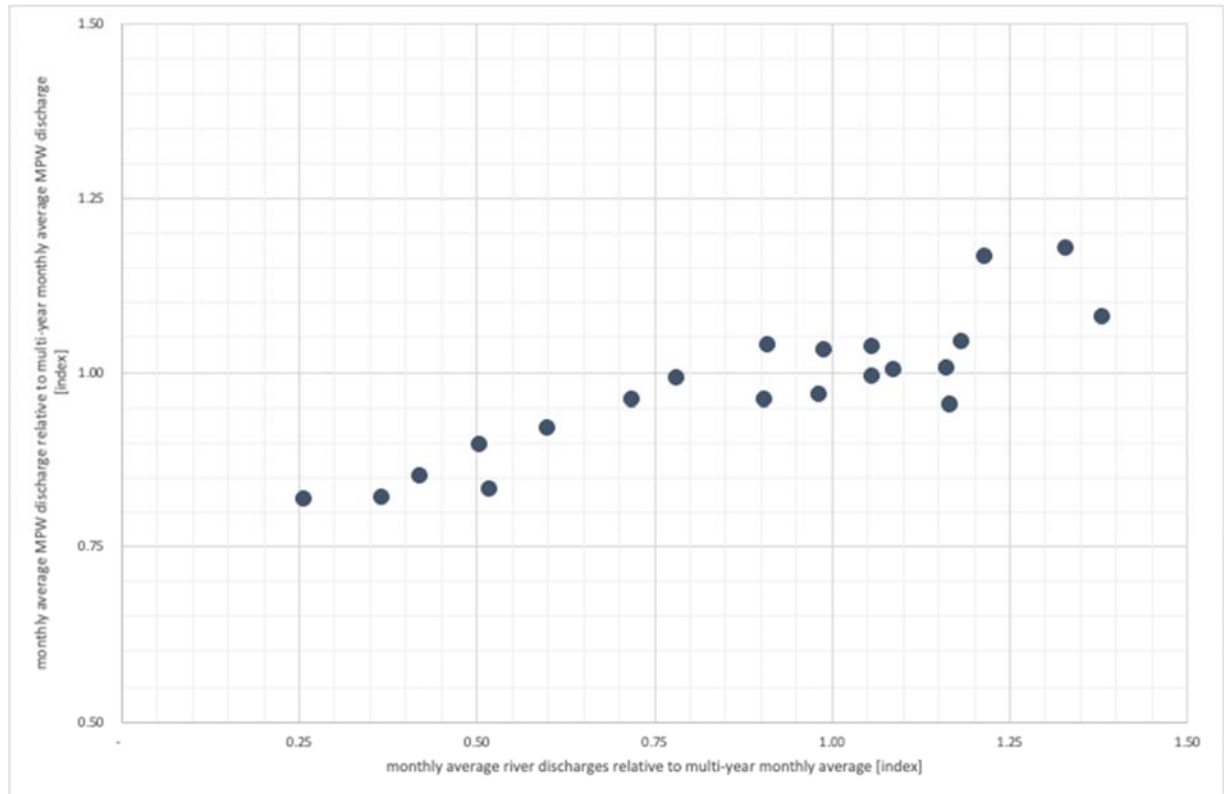

File S11. Indexed monthly average MPW discharges compared to multi-year indexed average river discharges for Java, both derived from model results. This figure shows the correlation between average riverine discharge and plastic waste discharges, as referred to in **section 3 – Results**.

File S12. Plastic discharges (thousand tons per year; low, mid and high estimates) for the top Indonesian rivers and share of total amount discharged in Indonesia. Note that for DKI Jakarta, results are combined for several rivers that flow through the area.

| Catchment          | Size (km <sup>2</sup> ) | Region     | Estimated plastic discharge (kton.year <sup>-1</sup> ) |       |       | Share (%) of total across Indonesia |
|--------------------|-------------------------|------------|--------------------------------------------------------|-------|-------|-------------------------------------|
|                    |                         |            | low                                                    | mid   | high  |                                     |
| DKI Jakarta rivers | 1,529.7                 | Java       | 28.76                                                  | 31.69 | 34.94 | 8.9                                 |
| Musi               | 55,447.1                | Sumatra    | 10.73                                                  | 15.88 | 20.81 | 4.7                                 |
| Bengawan Solo      | 15,538.4                | Java       | 3.86                                                   | 6.28  | 8.73  | 1.9                                 |
| Brantas            | 12,139.8                | Java       | 3.65                                                   | 5.60  | 7.68  | 1.7                                 |
| Cirarab            | 180.8                   | Java       | 2.47                                                   | 5.40  | 11.72 | 1.6                                 |
| Batanghari         | 44,802.4                | Sumatra    | 2.37                                                   | 4.35  | 7.04  | 1.3                                 |
| Serayu             | 3,794.0                 | Java       | 2.86                                                   | 4.32  | 5.84  | 1.3                                 |
| Kapuas             | 17,758.9                | Kalimantan | 2.57                                                   | 3.85  | 5.25  | 1.1                                 |
| Barito             | 61,094.7                | Kalimantan | 2.86                                                   | 3.70  | 4.60  | 1.1                                 |
| Citanduy           | 3,701.7                 | Java       | 2.24                                                   | 3.61  | 4.90  | 1.1                                 |

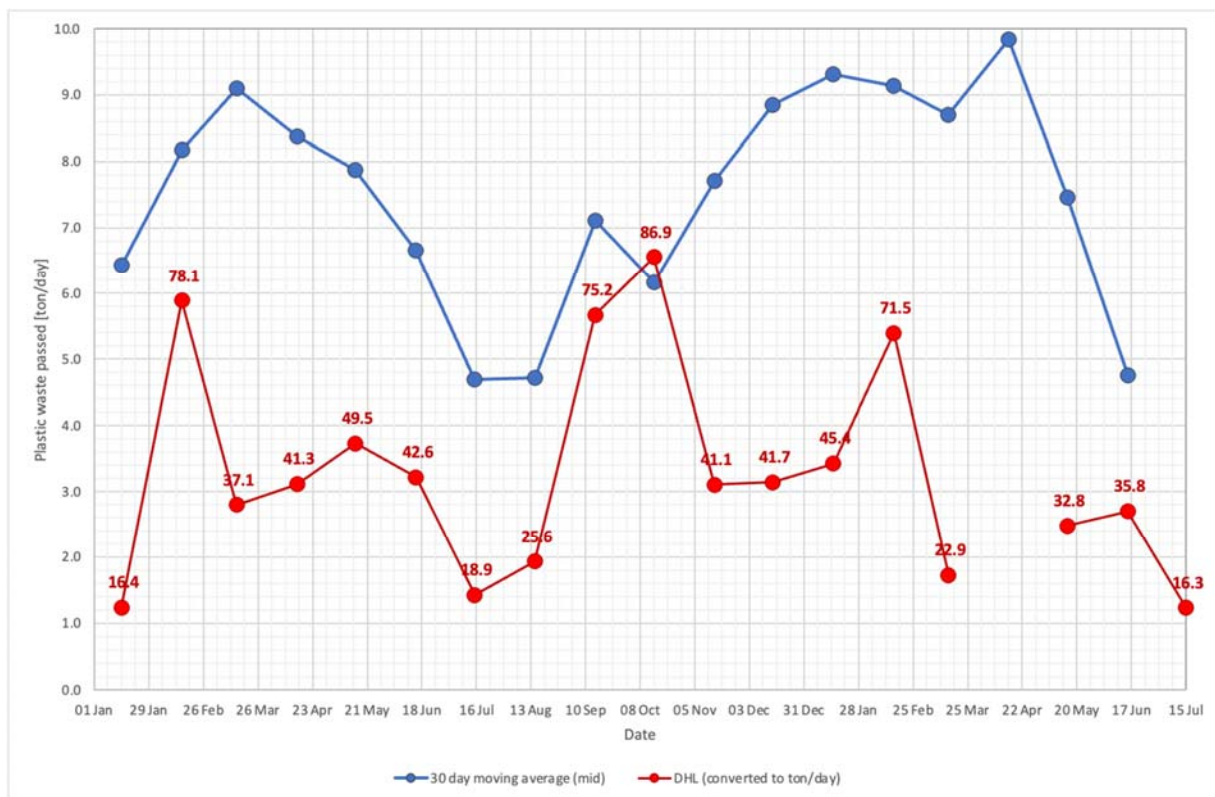

File S13. Plastic waste removed from Manggarai gate converted to tons/day (conversion rate derived from sampling composition of waste removed from waterways by the Municipal Environment Agency, DLH) (red); daily plastic discharge timeseries derived from model results (blue line). This supports the discussion in **section 3 - Results**, on the validation of the modelling results.

File S14. Estimated annual (365 day) leakages and discharges for Indonesia showing high uncertainty due to SWM input data. This supports the discussion **in section 3 – Results**.

|                              |         | estimated leakage from MPW |                    |                     | uncertainty<br>due to SWM<br>data |
|------------------------------|---------|----------------------------|--------------------|---------------------|-----------------------------------|
|                              |         | low<br>[kton/year]         | mid<br>[kton/year] | high<br>[kton/year] |                                   |
| point sources                |         | 31.0                       | 68.2               | 149.0               | <b>173.0%</b>                     |
| diffuse sources to land      |         | 184.1                      | 289.8              | 388.4               | <b>70.5%</b>                      |
| diffuse sources to water     |         | 273.7                      | 408.9              | 539.2               | <b>64.9%</b>                      |
| discharge                    | dry     | 211.6                      | 325.1              | 444.2               | <b>71.5%</b>                      |
|                              | average | 218.3                      | 336.1              | 460.7               | <b>72.1%</b>                      |
|                              | wet     | 229.4                      | 354.5              | 489.0               | <b>73.2%</b>                      |
| uncertainty due to hydrology |         | <b>8.1%</b>                | <b>8.7%</b>        | <b>9.7%</b>         |                                   |

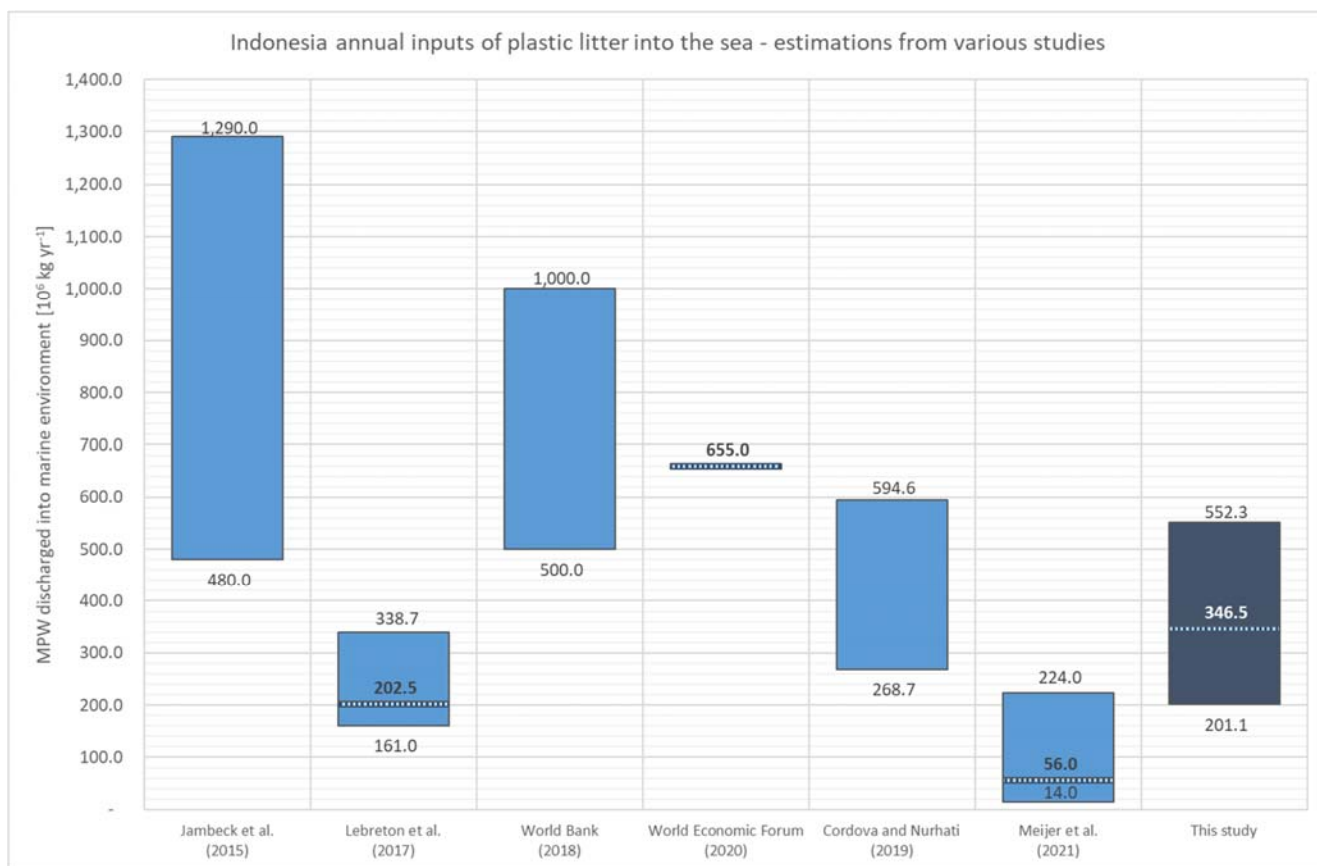

File S15. Comparison of the results with previous studies, revealing that the results from the other studies are within the range of our study. The blue bars indicate the range of the individual study results, and where available, the best estimate is provided as a dotted line. This supports the discussion **in section 4 – Discussion**.
